# Supplementary material
Source: Springer Nature journal article supplement (https://www.springermedizin.de/resource/supplementary/13023_2011_315_MOESM2_ESM.pdf/9642094)
Supplement: MOESM2 [file 9642094]

Patient diagnosed with MPS I  
(on the basis of clinical signs and symptoms)

$\leq 2.5$  yrs of age

ERT

HSCT\*\*  
(without delay)

$> 2.5$  yrs of age\*

ERT  
(without delay)

\* HSCT might be considered  
under special circumstances  
\*\* In patients with presumed  
MPS I-H
